# Supplementary material for: Disentangling the Relationship Between Conspiracy Mindset Versus Beliefs in Specific Conspiracy Theories
Source: Atypon-hosted journal article supplement (doi:10.1027/2151-2604/a000546), 2024-01-01
Supplement: 2151-2604_a000546_esm1.pdf [file 2151-2604_a000546_esm1.pdf]

## Electronic Supplementary Material 1 for

Strömbäck, J., Broda, E., Tsfati, Y., Kossowska, M., Vliegenthart, R. (2024). Disentangling the relationship between conspiracy mindset versus beliefs in specific conspiracy theories. *Zeitschrift für Psychologie*, 232(1). <https://doi.org/10.1027/2151-2604/a000546>

## Online Appendix A

Table E1. Sample structure

| Age                                                               | Frequency | Percent |
|-------------------------------------------------------------------|-----------|---------|
| Under 30                                                          | 101       | 6.11    |
| 30-39                                                             | 200       | 12.09   |
| 40-49                                                             | 249       | 15.05   |
| 50-59                                                             | 307       | 18.56   |
| 60-69                                                             | 380       | 22.97   |
| 70 or older                                                       | 417       | 25.21   |
| Total                                                             | 1654      | 100     |
| <b>Education</b>                                                  |           |         |
| Not completed elementary school                                   | 4         | .24     |
| Elementary school                                                 | 68        | 4.11    |
| High school or equivalent, less than three years                  | 220       | 13.30   |
| High school or equivalent, three years or longer                  | 320       | 19.35   |
| Post-high school education, not university, less than three years | 223       | 13.48   |
| Post-high school education, not university, three years or more   | 84        | 5.08    |
| University, less than three years                                 | 285       | 17.23   |
| University, three years or more                                   | 410       | 24.79   |
| PhD exam                                                          | 40        | 2.42    |
| Total                                                             | 1654      | 100     |
| <b>Sex</b>                                                        |           |         |
| Female                                                            | 820       | 49.58   |

## ESM 1 – Disentangling the Relationship Between Conspiracy Mindset Vs. Beliefs

|                        |      |       |
|------------------------|------|-------|
| Male                   | 834  | 50.42 |
| Total                  | 1654 | 100   |
| <b>Ideology</b>        |      |       |
| Left                   | 229  | 13.85 |
| Somewhat left          | 437  | 26.42 |
| Neither left nor right | 316  | 19.11 |
| Somewhat right         | 421  | 25.45 |
| right                  | 246  | 14.87 |
| Missing                | 5    | .03   |
| Total                  | 1654 | 100   |

**Table E2. Panel retention and attrition**

|        | Number of participants | Percentage retention | Percentage attrition |
|--------|------------------------|----------------------|----------------------|
| Wave 1 | 2477                   |                      |                      |
| Wave 2 | 2176                   | 87.85%               | 12.15%               |
| Wave 3 | 2103                   | 96.65%               | 3.35%                |

Notes: Based on participants who partially or fully completed each wave respectively

**Table E3. Logistic regression with wave 1 variables predicting survey completion**

|                       | wave 2<br>N=2344 | wave 3<br>N=1956 |
|-----------------------|------------------|------------------|
| 30-39 years old       | -.07             | .43              |
| 40-49 years old       | -.31             | .79***           |
| 50-59 years old       | -.53**           | 1.14***          |
| 60-69 years old       | -1.29***         | 2.10***          |
| 70 or older           | -1.36***         | 1.94***          |
| Medium education      | .10              | -.07             |
| High education        | .09              | .07              |
| Sex (m)               | -.15             | .15              |
| Ideology              | -.05             | .05              |
| Conspiracy mindset w1 | .69**            | /                |
| Conspiracy mindset w2 | /                | -.63*            |

Notes: the reference category for all age variables is 30 or younger; the reference category for medium and high education is low education

### Measurements of control variables in SEM models

*Age* was measured by asking participants to indicate which of the following age groups is applicable to them:

Under 30 years old

30-39 years old

40-49 years old

50-59 years old

60-69 years old

70 years old or older

*Gender* was measured by asking participants to indicate which of the following options is applicable to them: Female / Male

## ESM 1 – Disentangling the Relationship Between Conspiracy Mindset Vs. Beliefs

*Education* was measured by asking participants to indicate their level of education from the following options:

Not completed elementary school

Elementary school

High school or equivalent, shorter than 3 years

High school or equivalent, 3 years or longer

Post-high school education, not university, less than three years

Post-high school education, not university, three years or more

University, less than three years

University, three years or more

PhD exam

*Ideology* was measured by asking participants to place themselves on scale from left to right:

Strongly left-leaning

Somewhat left-leaning

Neither left nor right leaning

Somewhat right-leaning

Strongly right-leaning

**Online Appendix B**

**Table E4. Correlation matrix for statements that are included in the conspiracy mindset scale (Wave 1).**

|                                                                                                     |                     | <b>Correlations</b>                                                               |                                                                              |                                                                                                     |                                                                           |
|-----------------------------------------------------------------------------------------------------|---------------------|-----------------------------------------------------------------------------------|------------------------------------------------------------------------------|-----------------------------------------------------------------------------------------------------|---------------------------------------------------------------------------|
|                                                                                                     |                     | Many important things happen in the world that the public is never informed about | Governmental agencies' official versions of events oftentimes hide the truth | Scientists often only reveal results of their research that support their predetermined conclusions | There are secret organizations that greatly influence political decisions |
| Many important things happen in the world that the public is never informed about                   | Pearson Correlation | 1                                                                                 | .576**                                                                       | .449**                                                                                              | .472**                                                                    |
|                                                                                                     | Sig. (2-tailed)     |                                                                                   | .000                                                                         | .000                                                                                                | .000                                                                      |
|                                                                                                     | N                   | 1642                                                                              | 1633                                                                         | 1634                                                                                                | 1628                                                                      |
| Governmental agencies' official versions of events oftentimes hide the truth                        | Pearson Correlation | .576**                                                                            | 1                                                                            | .563**                                                                                              | .504**                                                                    |
|                                                                                                     | Sig. (2-tailed)     | .000                                                                              |                                                                              | .000                                                                                                | .000                                                                      |
|                                                                                                     | N                   | 1633                                                                              | 1638                                                                         | 1631                                                                                                | 1629                                                                      |
| Scientists often only reveal results of their research that support their predetermined conclusions | Pearson Correlation | .449**                                                                            | .563**                                                                       | 1                                                                                                   | .473**                                                                    |
|                                                                                                     | Sig. (2-tailed)     | .000                                                                              | .000                                                                         |                                                                                                     | .000                                                                      |
|                                                                                                     | N                   | 1634                                                                              | 1631                                                                         | 1638                                                                                                | 1628                                                                      |
| There are secret organizations that greatly influence political decisions                           | Pearson Correlation | .472**                                                                            | .504**                                                                       | .473**                                                                                              | 1                                                                         |
|                                                                                                     | Sig. (2-tailed)     | .000                                                                              | .000                                                                         | .000                                                                                                |                                                                           |
|                                                                                                     | N                   | 1628                                                                              | 1629                                                                         | 1628                                                                                                | 1634                                                                      |

## ESM 1 – Disentangling the Relationship Between Conspiracy Mindset Vs. Beliefs

\*\* . Correlation is significant at the 0.01 level (2-tailed).

**Table E5. Correlation matrix for statements that are included in the conspiracy mindset scale (Wave 2).**

|                                                                                                     |                     | <b>Correlations</b>                                                                                          |                                                                                                 |                                                                                                                              |                                                                                              |
|-----------------------------------------------------------------------------------------------------|---------------------|--------------------------------------------------------------------------------------------------------------|-------------------------------------------------------------------------------------------------|------------------------------------------------------------------------------------------------------------------------------|----------------------------------------------------------------------------------------------|
|                                                                                                     |                     | Many<br>important<br>things<br>happen in<br>the world<br>that the<br>public is<br>never<br>informed<br>about | Government<br>al agencies'<br>official<br>versions of<br>events<br>oftentimes<br>hide the truth | Scientists<br>often only<br>reveal results<br>of their<br>research that<br>support their<br>predetermine<br>d<br>conclusions | There are<br>secret<br>organization<br>s that greatly<br>influence<br>political<br>decisions |
| Many important things happen in the world that the public is never informed about                   | Pearson Correlation | 1                                                                                                            | .555**                                                                                          | .464**                                                                                                                       | .508**                                                                                       |
|                                                                                                     | Sig. (2-tailed)     |                                                                                                              | .000                                                                                            | .000                                                                                                                         | .000                                                                                         |
|                                                                                                     | N                   | 1648                                                                                                         | 1644                                                                                            | 1642                                                                                                                         | 1638                                                                                         |
| Governmental agencies' official versions of events oftentimes hide the truth                        | Pearson Correlation | .555**                                                                                                       | 1                                                                                               | .581**                                                                                                                       | .568**                                                                                       |
|                                                                                                     | Sig. (2-tailed)     | .000                                                                                                         |                                                                                                 | .000                                                                                                                         | .000                                                                                         |
|                                                                                                     | N                   | 1644                                                                                                         | 1645                                                                                            | 1642                                                                                                                         | 1637                                                                                         |
| Scientists often only reveal results of their research that support their predetermined conclusions | Pearson Correlation | .464**                                                                                                       | .581**                                                                                          | 1                                                                                                                            | .474**                                                                                       |
|                                                                                                     | Sig. (2-tailed)     | .000                                                                                                         | .000                                                                                            |                                                                                                                              | .000                                                                                         |
|                                                                                                     | N                   | 1642                                                                                                         | 1642                                                                                            | 1643                                                                                                                         | 1635                                                                                         |
|                                                                                                     | Pearson Correlation | .508**                                                                                                       | .568**                                                                                          | .474**                                                                                                                       | 1                                                                                            |
|                                                                                                     | Sig. (2-tailed)     | .000                                                                                                         | .000                                                                                            | .000                                                                                                                         |                                                                                              |

ESM 1 – Disentangling the Relationship Between Conspiracy Mindset Vs. Beliefs

|                                                                           |   |      |      |      |      |
|---------------------------------------------------------------------------|---|------|------|------|------|
| There are secret organizations that greatly influence political decisions | N | 1638 | 1637 | 1635 | 1640 |
|---------------------------------------------------------------------------|---|------|------|------|------|

\*\* . Correlation is significant at the 0.01 level (2-tailed).

**Table E6. Correlation matrix for statements that are included in the conspiracy mindset scale (Wave 3).**

|                                                                                   |                     | <b>Correlations</b>                                                               |                                                                              |                                                                                       |                                                                           |
|-----------------------------------------------------------------------------------|---------------------|-----------------------------------------------------------------------------------|------------------------------------------------------------------------------|---------------------------------------------------------------------------------------|---------------------------------------------------------------------------|
|                                                                                   |                     | Many important things happen in the world that the public is never informed about | Governmental agencies' official versions of events oftentimes hide the truth | Scientists often only reveal results of their research that predetermined conclusions | There are secret organizations that greatly influence political decisions |
| Many important things happen in the world that the public is never informed about | Pearson Correlation | 1                                                                                 | .598**                                                                       | .498**                                                                                | .539**                                                                    |
|                                                                                   | Sig. (2-tailed)     |                                                                                   | .000                                                                         | .000                                                                                  | .000                                                                      |
|                                                                                   | N                   | 1642                                                                              | 1637                                                                         | 1634                                                                                  | 1634                                                                      |
| Governmental agencies' official versions of events oftentimes hide the truth      | Pearson Correlation | .598**                                                                            | 1                                                                            | .625**                                                                                | .572**                                                                    |
|                                                                                   | Sig. (2-tailed)     | .000                                                                              |                                                                              | .000                                                                                  | .000                                                                      |
|                                                                                   | N                   | 1637                                                                              | 1643                                                                         | 1632                                                                                  | 1634                                                                      |
|                                                                                   | Pearson Correlation | .498**                                                                            | .625**                                                                       | 1                                                                                     | .497**                                                                    |
|                                                                                   | Sig. (2-tailed)     | .000                                                                              | .000                                                                         |                                                                                       | .000                                                                      |

## ESM 1 – Disentangling the Relationship Between Conspiracy Mindset Vs. Beliefs

|                                                                                                     |                     |        |        |        |      |
|-----------------------------------------------------------------------------------------------------|---------------------|--------|--------|--------|------|
| Scientists often only reveal results of their research that support their predetermined conclusions | N                   | 1634   | 1632   | 1637   | 1629 |
| There are secret organizations that greatly influence political decisions                           | Pearson Correlation | .539** | .572** | .497** | 1    |
|                                                                                                     | Sig. (2-tailed)     | .000   | .000   | .000   |      |
|                                                                                                     | N                   | 1634   | 1634   | 1629   | 1637 |

\*\* . Correlation is significant at the 0.01 level (2-tailed).



**Online Appendix C**

**Distribution conspiracy mindset and belief in specific conspiracies (1-4) across waves**

Figure E1. Conspiracy mindset wave 1.

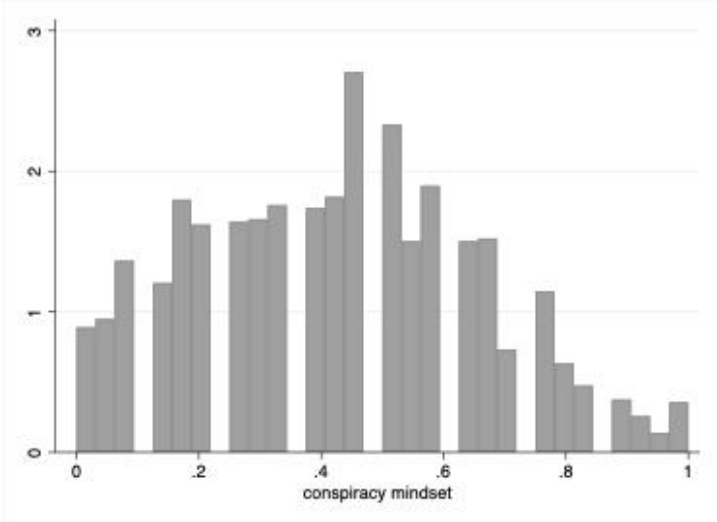

Figure E2. Conspiracy mindset wave 2.

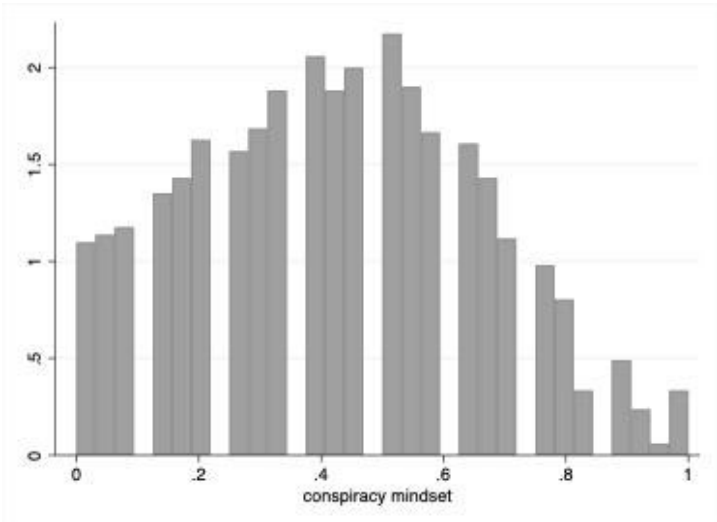

Figure E3. conspiracy mindset wave 3.

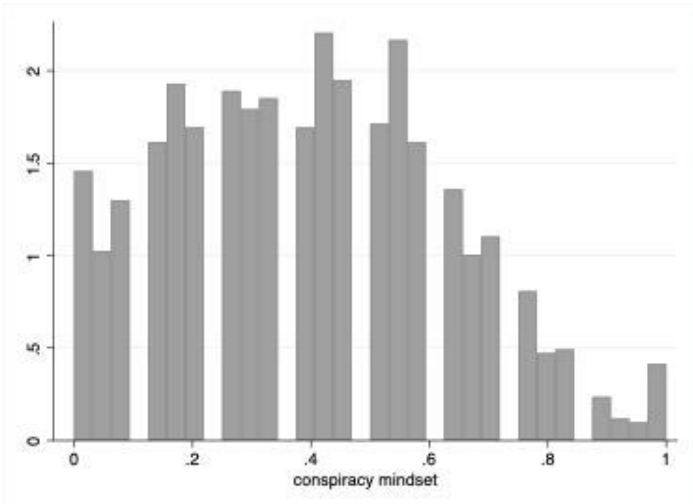

Figure E4. Great Replacement wave 1.

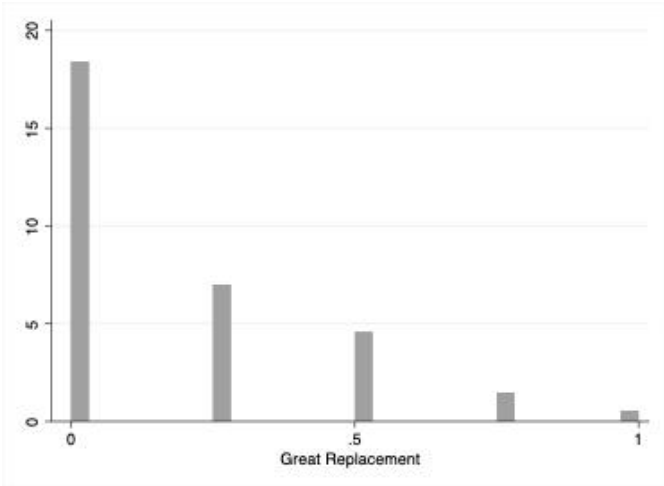

Figure E5. Great Replacement wave 2.

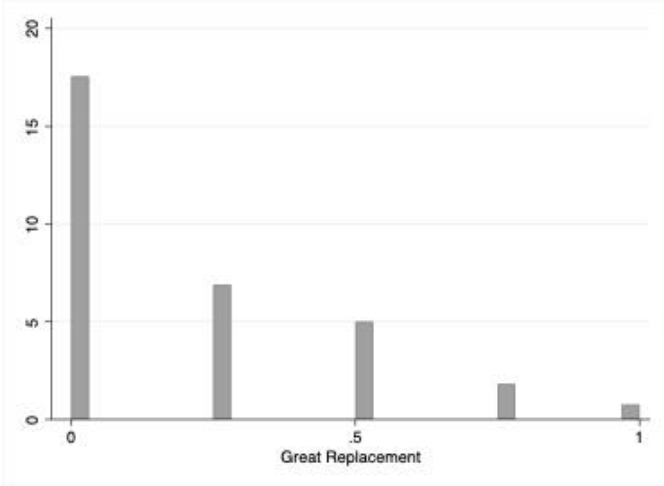

Figure E6. Great Replacement wave 3.

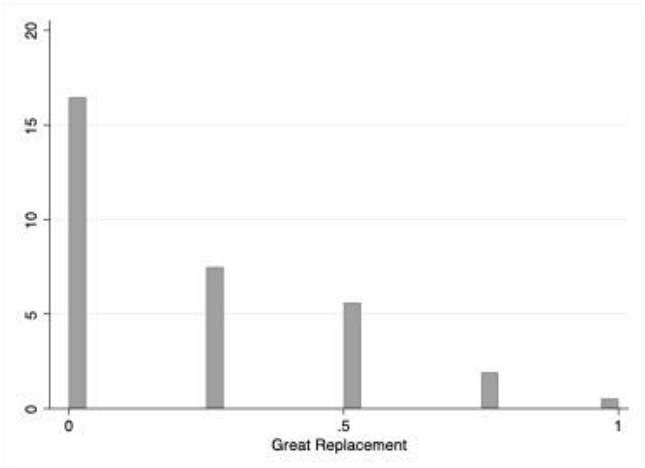

Figure E7. Covid bioweapon wave 1.

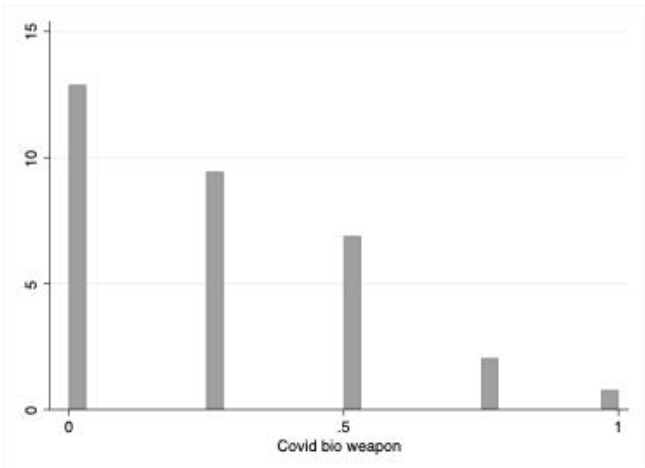

Figure E8. Covid bioweapon wave 2.

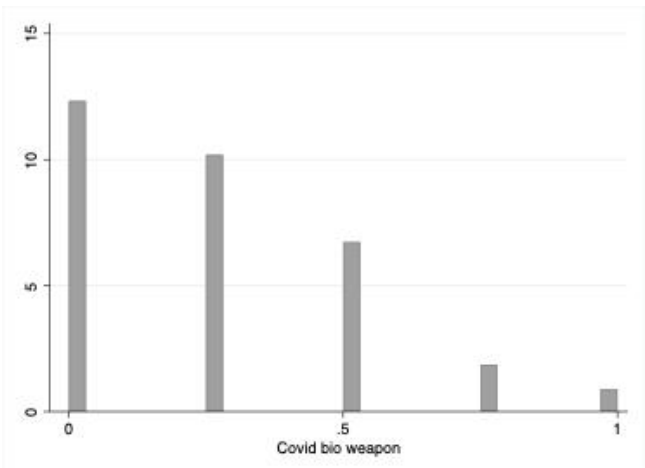

Figure E9. Covid bioweapon wave 3.

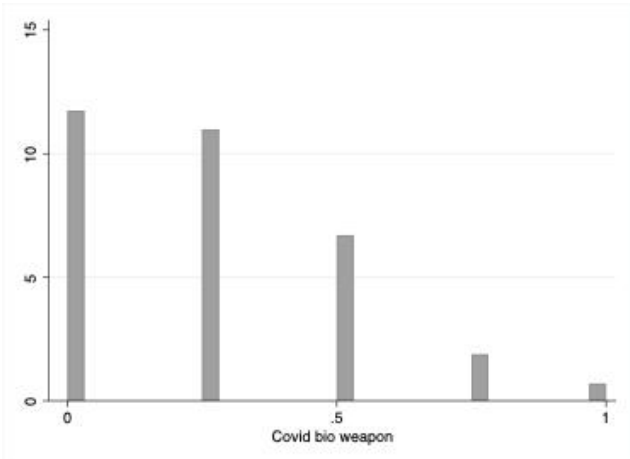

Figure E10. Estonia catastrophe wave 1.

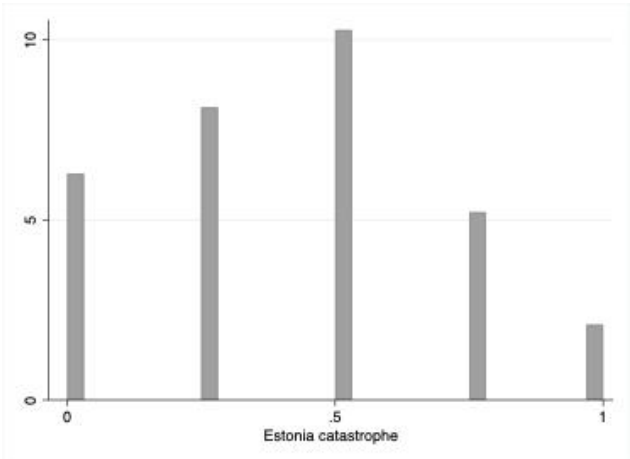

Figure E11. Estonia catastrophe wave 2.

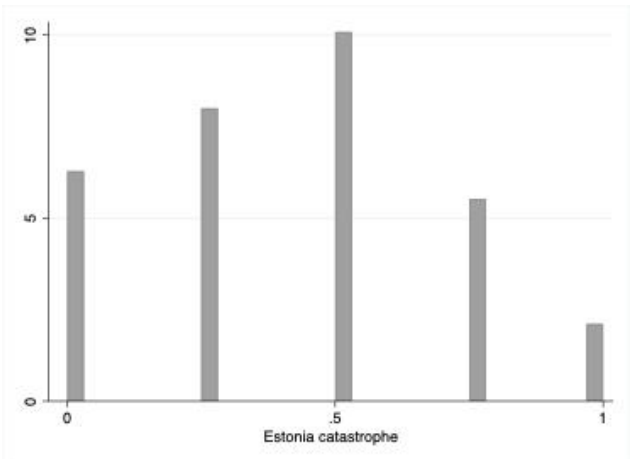

Figure E12. Estonia catastrophe wave 3.

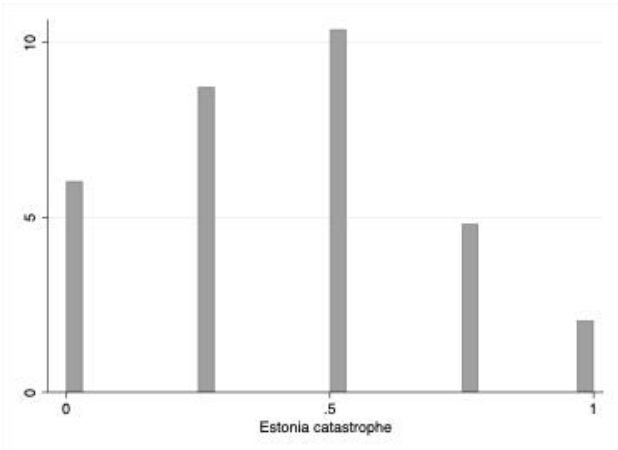

Figure E13. Big Pharma wave 1.

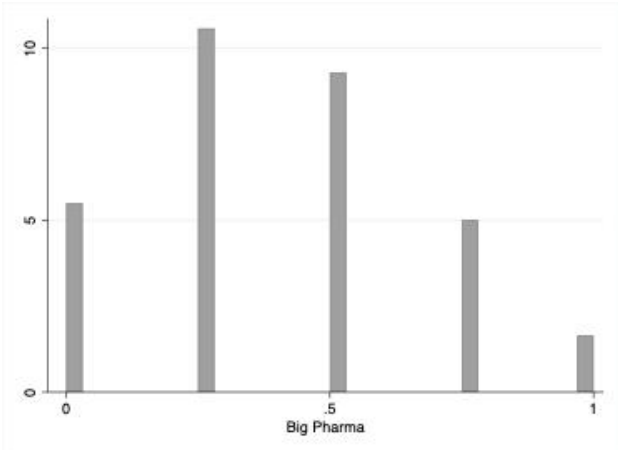

Figure E14. Big Pharma wave 2.

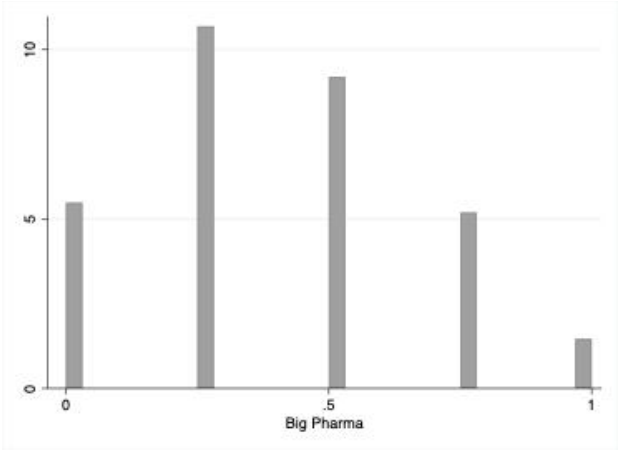

Figure E15. Big Pharma wave 3.

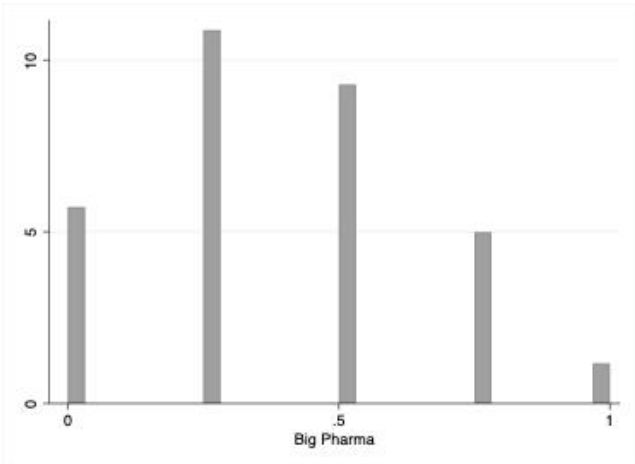

### Online Appendix D

The table below presents tests for normality. The Shapiro Wilk test should be preferred as our n is smaller than 2000. Significant values represent deviations from normality. The specific conspiracies in all waves are in the upper part of the table. The conspiracy mindset scale is for the three waves is at the bottom. As can be seen, in all cases the distributions significantly deviate from normality, as described in the text. However, the higher values of the Shapiro-Wilk test (and lower values for the Kolmogorov-Smirnov test) for the conspiracy mindset scale in all three waves supports the argument that the scales are more normally distributed compared to beliefs in specific conspiracies.

**Table E7. Kolmogorob-Smirnov and Shapiro-Wilk tests for normality for beliefs in specific conspiracy theories and the conspiracy mindset scale.**

|                                                                                                 | Tests of Normality              |      |      |              |      |      |
|-------------------------------------------------------------------------------------------------|---------------------------------|------|------|--------------|------|------|
|                                                                                                 | Kolmogorov-Smirnov <sup>a</sup> |      |      | Shapiro-Wilk |      |      |
|                                                                                                 | Statistic                       | df   | Sig. | Statistic    | df   | Sig. |
| Wave 1: There is a secret plan to replace white Christians in Europe with Muslims               | .342                            | 1606 | .000 | .729         | 1606 | .000 |
| Wave 1: The Coronavirus was created as a biological weapon                                      | .237                            | 1606 | .000 | .832         | 1606 | .000 |
| Wave 1: The real reason for the Estonia-catastrophe has been hidden by the authorities          | .166                            | 1606 | .000 | .908         | 1606 | .000 |
| Wave 1: The pharmaceutical industries very often hide dangerous side-effects of their medicines | .206                            | 1606 | .000 | .905         | 1606 | .000 |

## ESM 1 – Disentangling the Relationship Between Conspiracy Mindset Vs. Beliefs

|                                                                                                 |      |      |      |      |      |      |
|-------------------------------------------------------------------------------------------------|------|------|------|------|------|------|
| Wave 2: There is a secret plan to replace white Christians in Europe with Muslims               | .324 | 1606 | .000 | .750 | 1606 | .000 |
| Wave 2: The Coronavirus was created as a biological weapon                                      | .226 | 1606 | .000 | .835 | 1606 | .000 |
| Wave 2: The real reason for the Estonia-catastrophe has been hidden by the authorities          | .169 | 1606 | .000 | .908 | 1606 | .000 |
| Wave 2: The pharmaceutical industries very often hide dangerous side-effects of their medicines | .207 | 1606 | .000 | .905 | 1606 | .000 |
| Wave 3: There is a secret plan to replace white Christians in Europe with Muslims               | .306 | 1606 | .000 | .775 | 1606 | .000 |
| Wave 3: The Coronavirus was created as a biological weapon                                      | .220 | 1606 | .000 | .842 | 1606 | .000 |
| Wave 3: The real reason for the Estonia-catastrophe has been hidden by the authorities          | .172 | 1606 | .000 | .907 | 1606 | .000 |
| Wave 3: The pharmaceutical industries very often hide dangerous side-effects of their medicines | .208 | 1606 | .000 | .902 | 1606 | .000 |
| Conspiracy mindset scale Wave 1                                                                 | .063 | 1606 | .000 | .982 | 1606 | .000 |
| Conspiracy mindset scale Wave 2                                                                 | .058 | 1606 | .000 | .982 | 1606 | .000 |
| Conspiracy mindset scale Wave 3                                                                 | .068 | 1606 | .000 | .978 | 1606 | .000 |

a. Lilliefors Significance Correction
